# Supplementary material for: Microbiological and Molecular Features Associated with Persistent and Relapsing Staphylococcus aureus Prosthetic Joint Infection
Source: MDPI journal article supplement (doi:10.3390/antibiotics11081119), 2022-08-18
Supplement: s1 [file s1]

**Figure S2. Comparisons in the adhesion, invasion and persistence capacities between initial and second *S. aureus* isolates.** Initial isolates: *S. aureus* isolates recovered at initial time of diagnosis prior to surgery; Second isolates: *S. aureus* isolates obtained after or during antimicrobial treatment. Results were expressed as the median and interquartile range. Statistical analysis was performed using Mann-Whitney U-test (ns: no significant).

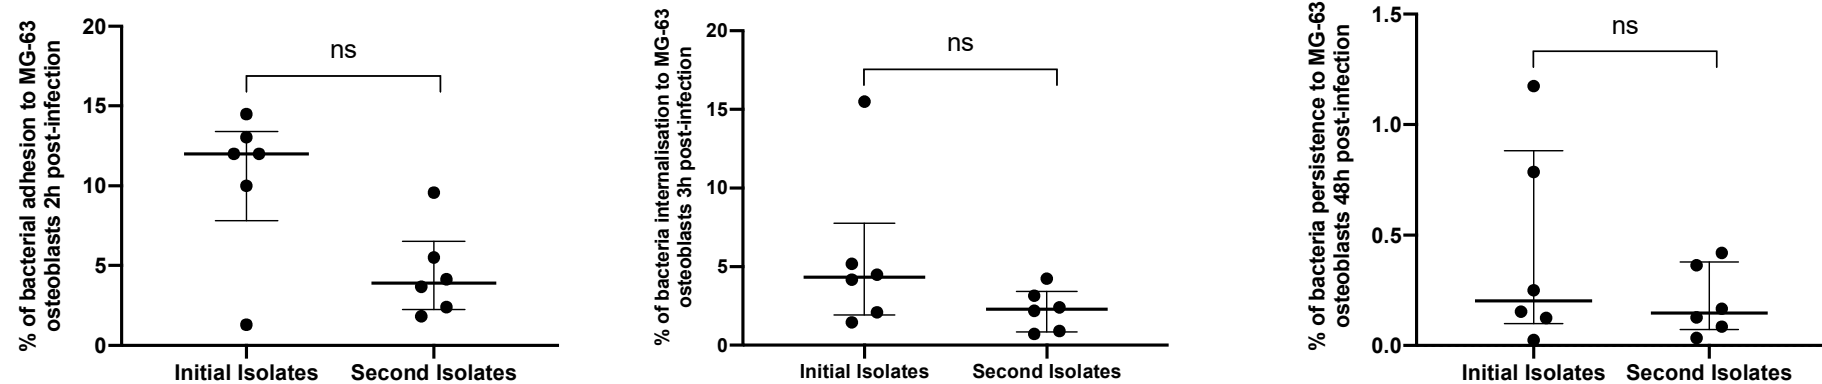

**Figure S3. Ability to form biofilm of initial- and second *S. aureus* isolates retrieved from the same patient at the initial time of diagnosis and at the time of persistence or relapsed.** Results show the means  $\pm$  standard deviation (SD). Statistical analyses were performed by using Mann-Whitney U-test (ns: no significant).

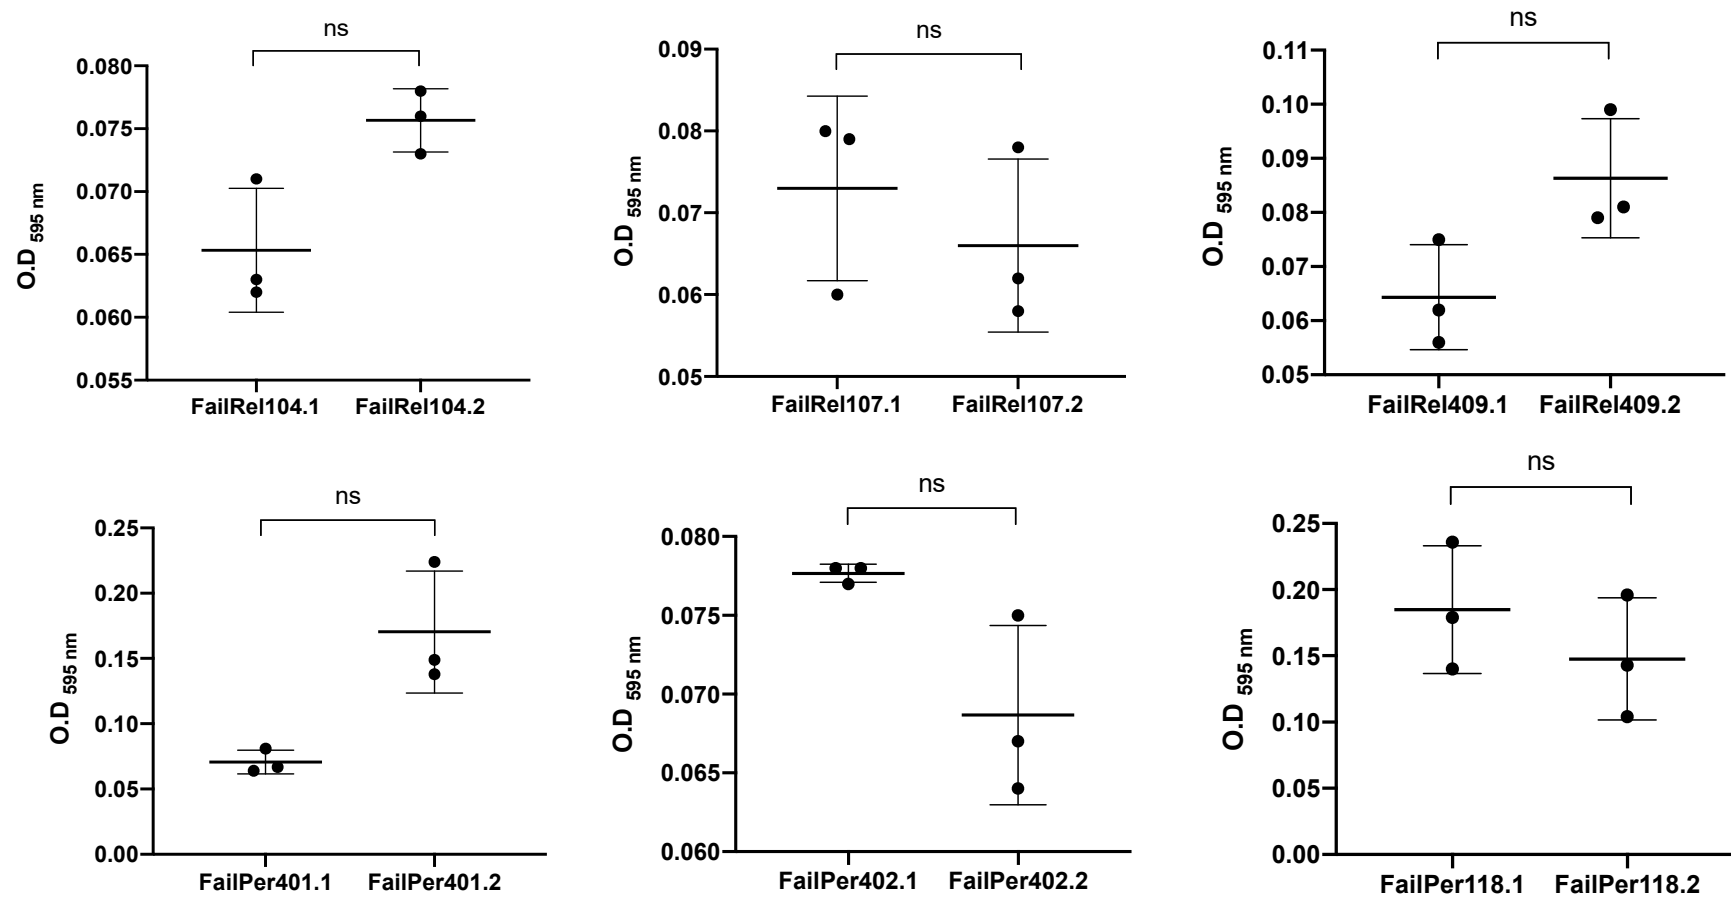

**Figure S4. Cytotoxic effect after infection between the different pairs of *S. aureus* grouped into relapse- or persistent- in human osteoblasts.** The results are expressed as the percentage of the value of LDH released 24 h post infection and uninfected cells. The horizontal bars denote the means  $\pm$  SD of three independent experiments. No significant differences (ns) were observed between any pair of recurrent- or persistent/relapsed- *S. aureus* isolate (Mann-Whitney U test).

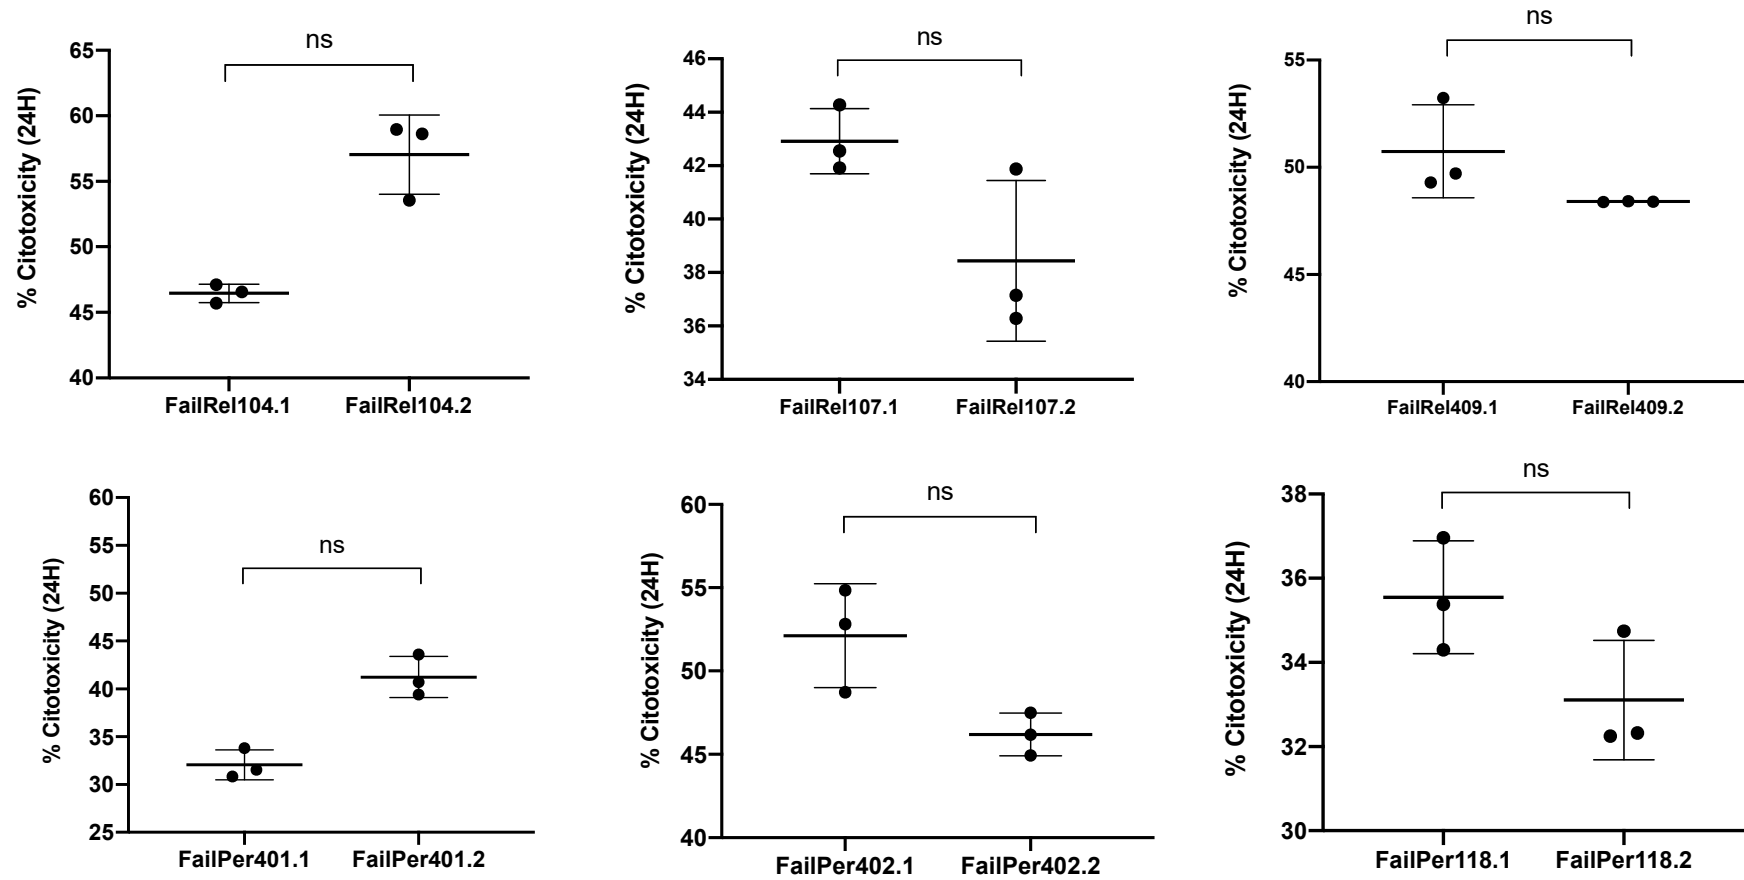

**Figure S5. Abilities of *S. aureus* strains to bind to fibronectin.** Data are the means  $\pm$  standard deviation (sd) of three replicate experiments. Comparison of the data using Mann-Whitney showed no significant difference between the initial *S. aureus* strain isolated at time of diagnosis and persistent or relapsed strains (ns: no significant).

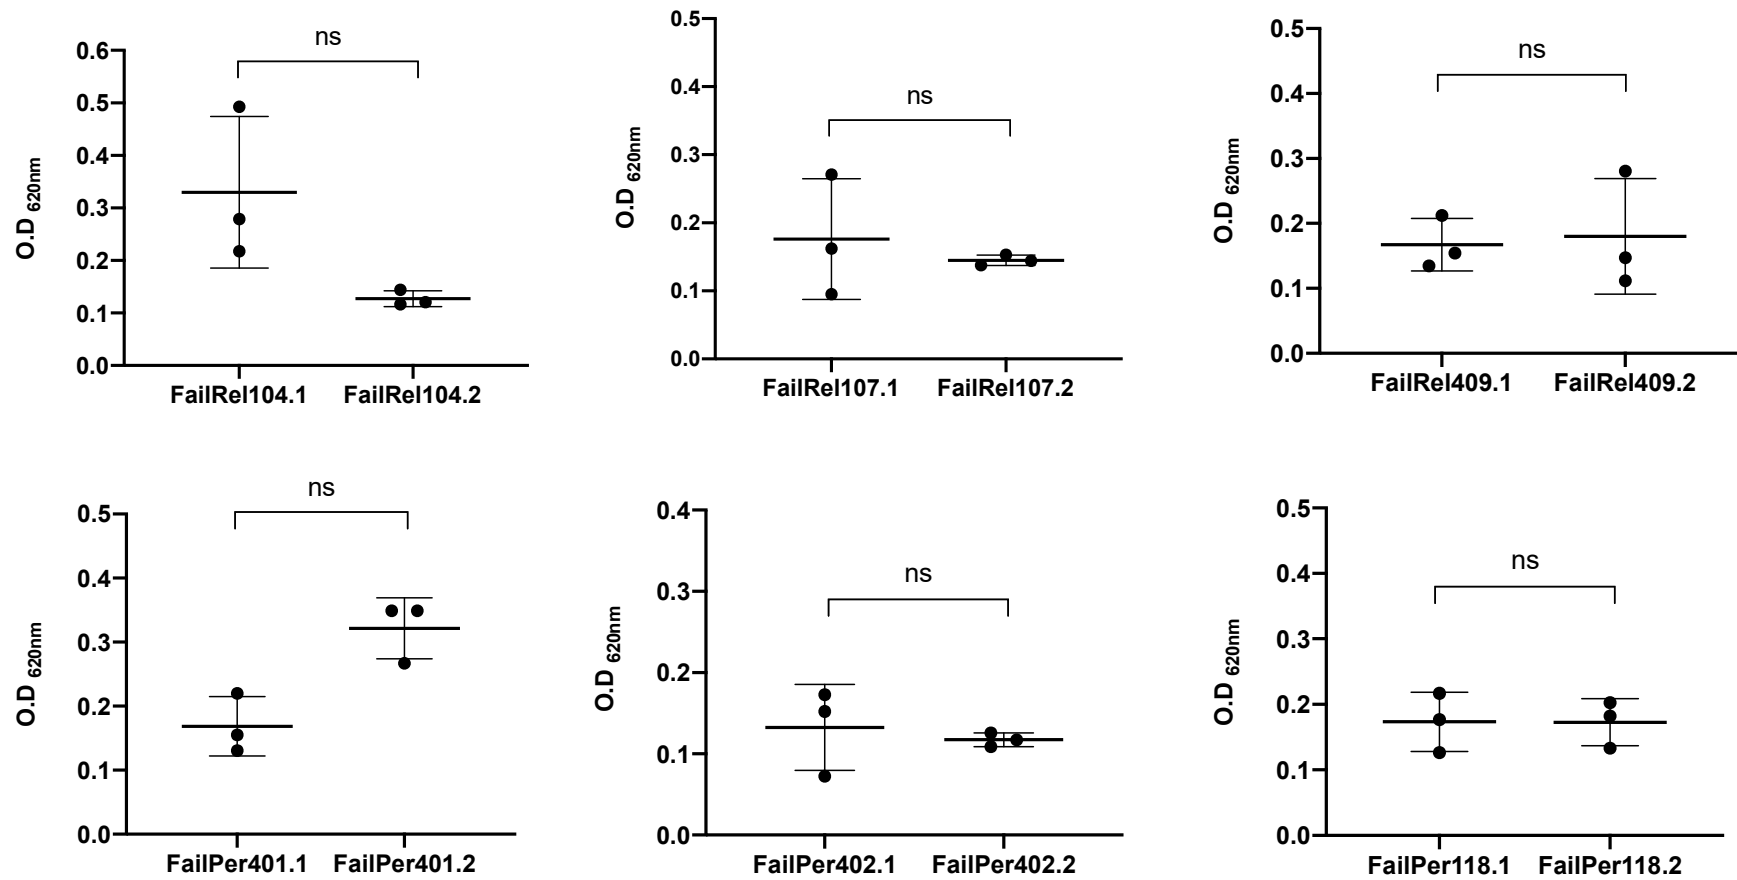

**Table S1.** Molecular epidemiology of *S. aureus* strains causing PJI and reference strains used for each strain and each bioinformatic analysis.

| <b>Strain</b><br>(code) | <b>CC</b> | <b>ST</b> | <b><i>spa</i> type</b> | <b>Reference<sup>a</sup></b><br>(annotation) | <b>Reference</b><br>(variants) <sup>b</sup> |
|-------------------------|-----------|-----------|------------------------|----------------------------------------------|---------------------------------------------|
| FailRel104.1            | 15        | 15        | -                      | MSSA476                                      | MSSA476                                     |
| FailRel104.2            | 15        | 15        | -                      | MSSA476                                      | MSSA476                                     |
| FailRel107.1            | 398       | 398       | -                      | SO385                                        | SO385                                       |
| FailRel107.2            | 398       | 398       | -                      | SO385                                        | SO385                                       |
| FailRel409.1            | 188       | 188       | -                      | MSSA476                                      | MSSA476                                     |
| FailRel409.2            | 188       | 188       | -                      | MSSA476                                      | MSSA476                                     |
| FailPer401.1            | 45        | 45        | t026                   | CA-347                                       | CA-347                                      |
| FailPer401.2            | 45        | 45        | t026                   | CA-347                                       | CA-347                                      |
| FailPer402.1            | 5         | 5         | -                      | N315                                         | N315                                        |
| FailPer402.2            | 5         | 5         | -                      | N315                                         | N315                                        |
| FailPer118.1            | 5         | 125       | t067                   | N315                                         | N315                                        |
| FailPer118.2            | 5         | 125       | t067                   | N315                                         | N315                                        |
| Cure116.1               | 5         | 5         | -                      | N315                                         | N315                                        |
| Cure804.1               | 10        | 10        | -                      | N315                                         | N315                                        |
| Cure806.1               | 45        | 45        | -                      | CA-347                                       | N315                                        |
| Cure111.1               | 30        | 30        | -                      | MRSA252                                      | N315                                        |
| Cure112.1               | 6         | 6         | -                      | N315                                         | N315                                        |
| Cure208.1               | 509       | 509       | -                      | N315                                         | N315                                        |
| Cure807.1               | 45        | 45        | -                      | CA-347                                       | N315                                        |
| Cure808.1               | 1         | 852       | -                      | MSSA476                                      | N315                                        |

Abbreviations: CC, clonal complex; ST, sequence type.

<sup>a</sup>The CCs y STs of reference strains are as follow: MSSA476 (CC1, ST1, BX571857.1), SO385 (CC398, ST398, AM990992.1), N315 (CC5, ST5, BA000018.3), MRSA252 (CC30, ST30, BX571856.1), CA-347 (CC45, ST45, CP006044.1).

<sup>b</sup>The variant analysis was performed with the reference strain N315 (CC5), since it was the major CC, except for the variant analysis between each pair of strains from the same patient with persistent or relapsing PJI, for which the reference strain most suitable for the CC of each pair of strains was chosen.

**Table S2.** Virulence genes of all the strains causing the 14 prosthetic joint infections included in this study<sup>1</sup>.

| Virulence                                                                              | Gene         | All cases<br>(n=14) | Persistence/relapse<br>(n=6) | Cure<br>(n=8) |
|----------------------------------------------------------------------------------------|--------------|---------------------|------------------------------|---------------|
|                                                                                        |              | No. (%)             | No. (%)                      | No. (%)       |
| Proteases                                                                              | <i>splA</i>  | 6 (42.9)            | 3 (50.0)                     | 3 (37.5)      |
|                                                                                        | <i>splB</i>  | 6 (42.9)            | 3 (50.0)                     | 3 (37.5)      |
|                                                                                        | <i>aur</i>   | 14 (100.0)          | 6 (100.0)                    | 8 (100.0)     |
| Enterotoxins                                                                           | <i>seg</i>   | 8 (57.1)            | 3 (50.0)                     | 5 (62.5)      |
|                                                                                        | <i>sea</i>   | 4 (28.6)            | 1 (16.7)                     | 3 (37.5)      |
| Toxic shock toxin                                                                      | <i>tst</i>   | 1 (7.1)             | 0 (0.0)                      | 1 (12.5)      |
| Leukocidins                                                                            | <i>lukE</i>  | 8 (57.1)            | 4 (66.7)                     | 4 (50.0)      |
|                                                                                        | <i>lukD</i>  | 8 (57.1)            | 4 (66.7)                     | 4 (50.0)      |
| Haemolysins                                                                            | <i>hlg</i>   | 14 (100.0)          | 6 (100.0)                    | 8 (100.0)     |
|                                                                                        | <i>hla</i>   | 14 (100.0)          | 6 (100.0)                    | 8 (100.0)     |
| Hlb-phages                                                                             | <i>scn</i>   | 13 (92.9)           | 5 (83.3)                     | 8 (100.0)     |
|                                                                                        | <i>sak</i>   | 11 (78.6)           | 4 (66.7)                     | 7 (87.5)      |
|                                                                                        | <i>chp</i>   | 10 (71.4)           | 4 (66.7)                     | 6 (75.0)      |
| MSCRAMMs<br>(microbial surface<br>components recognizing<br>adhesive matrix molecules) | <i>clfA</i>  | 11 (78.6)           | 5 (83.3)                     | 6 (75.0)      |
|                                                                                        | <i>clfB</i>  | 10 (71.4)           | 3 (50.0)                     | 7 (87.5)      |
|                                                                                        | <i>cna</i>   | 9 (64.3)            | 3 (50.0)                     | 6 (75.0)      |
|                                                                                        | <i>fnbpA</i> | 14 (100.0)          | 6 (100.0)                    | 8 (100.0)     |
|                                                                                        | <i>fnbpB</i> | 12 (85.7)           | 6 (100.0)                    | 6 (75.0)      |
|                                                                                        | <i>ebpS</i>  | 14 (100.0)          | 6 (100.0)                    | 8 (100.0)     |
|                                                                                        | <i>spa</i>   | 14 (100.0)          | 6 (100.0)                    | 8 (100.0)     |
|                                                                                        | <i>sdrC</i>  | 14 (100.0)          | 6 (100.0)                    | 8 (100.0)     |
|                                                                                        | <i>sdrD</i>  | 11 (78.6)           | 6 (100.0)                    | 5 (62.5)      |
| Extracellular proteins                                                                 | <i>coA</i>   | 14 (100.0)          | 6 (100.0)                    | 8 (100.0)     |
|                                                                                        | <i>efb</i>   | 14 (100.0)          | 6 (100.0)                    | 8 (100.0)     |
| Biofilm formation                                                                      | <i>atl</i>   | 14 (100.0)          | 6 (100.0)                    | 8 (100.0)     |
| LPXTG motif                                                                            | <i>sasG</i>  | 7 (50.0)            | 3 (50.0)                     | 4 (50.0)      |
| Polysaccharide intracellular<br>adhesin (PIA)                                          | <i>icaB</i>  | 14 (100.0)          | 6 (100.0)                    | 8 (100.0)     |
|                                                                                        | <i>icaC</i>  | 14 (100.0)          | 6 (100.0)                    | 8 (100.0)     |
|                                                                                        | <i>icaD</i>  | 14 (100.0)          | 6 (100.0)                    | 8 (100.0)     |

<sup>1</sup>In relapsing/persistent cases it has only been included the first strain for this analysis.
